# Supplementary material for: Self-Supervised Temporal Reconstruction of Subhourly Climate Records since 1806
Source: Research Square preprint supplement (doi:10.21203/rs.3.rs-8341528/v1), 2025-12-23
Supplement: Supplementary file 1 [file a4fa296d1e6db2b9ad9a6d7b.docx]

Supplementary Information for

**Self-Supervised Temporal Reconstruction of Subhourly Climate Records since 1806**

Liwen Wang1,2, Qian Li1,2, Zeming Zhou1, Baoxiang Pan3, Xichen Li4, Liang Zhao5, Sheng Li1,2, Xuan Peng1,2, Yanwen Wang1,2

1College of Meteorology and Oceanography, National University of Defense Technology, Changsha, China.

2Key Laboratory of High Impact Weather, China Meteorological Administration, Changsha, China.

3Institute of Atmospheric Physics, Chinese Academy of Sciences, Beijing, China.

4Institute of Ocean Research, Peking University, Beijing, China.

5State Key Laboratory of Numerical Modeling for Atmospheric Sciences and Geophysical Fluid Dynamics, Institute of Atmospheric Physics, Chinese Academy of Sciences, Beijing, China.

Corresponding author: Qian Li, liqian@nudt.edu.cn

**Contents of this file**

Supplementary Text 1

Supplementary Text 2

Supplementary Figure S1

Supplementary Figure S2

Supplementary Figure S3

Supplementary Figure S4

Supplementary Figure S5

Supplementary Figure S6

Supplementary Figure S7

Supplementary Figure S8

Supplementary Figure S9

Supplementary Figure S10

Supplementary Figure S11

Supplementary Figure S12

Supplementary Figure S13

Supplementary Figure S14

Supplementary Figure S15

Supplementary Figure S16

Supplementary Figure S17

Supplementary Figure S18

Supplementary Figure S19

Supplementary Figure S20

Supplementary Figure S21

Supplementary Figure S22

Supplementary Figure S23

Supplementary Text 1

Let be a second-order, zero-mean, statistically stationary process with temporal power spectrum Wiener–Khinchin gives the autocovariance Defining the cumulative field yields fractional Brownian motion with Hurst exponent ; hence the self-similar law, for any scale factor Sample at cadence to obtain the coarse series . For any integer , let the target fine step be . Write the fine-scale increment

Self-similarity gives with a dimensionless kernel independent of . Thus the joint distribution of the unobserved vector retains exactly the same parametric form for every ; only the scale factor changes. Condition on the coarse observation (equivalently the coarse increment ). Because is jointly Gaussian with covariance determined solely by , the conditional mean and covariance of are analytic functions of and the ratio .

Hence the fine-scale statistics are completely specified by: (1) the spectral exponent , and (2) the observed coarse values; no external high-frequency labels enter. Learning (or ) from any segment of the coarse series suffices to infer these conditional laws for all finer steps because of scale invariance. A parametric or non-parametric estimator trained on the coarse data therefore yields an asymptotically unbiased predictor of the fine increments; the reconstruction error converges in as the estimator of converges. Since atmospheric near-surface variables empirically satisfy with common across regions and state variables, the above argument holds simultaneously for multivariate fields when cross-spectra obey analogous power-law co-scaling. Consequently, temporal downscaling from hourly (or 3-hourly) cadence to sub-hourly cadence is identifiable and learnable in a self-supervised fashion using only the low-frequency archive.

Supplementary Text 2

While NOAA's 15-minute station-based precipitation records offer valuable near-surface hydrometeorological observations, several limitations constrain their applicability for high-resolution model training and evaluation. First, temporal continuity is inconsistent. Many stations do not adhere to a strict 15-minute cadence; repeated entries with identical timestamps (e.g., CRESTON NE on 2010-09-23) and missing values (e.g., QPCP = –9999) are frequent. These disrupt the temporal structure of precipitation time series, obscure abrupt transitions, and impair the detection of extreme or convective events. Second, uncertainty quantification is inadequate. Although quality control fields such as Measurement Flag and Quality Flag are present, they lack interpretable confidence metrics or structured error covariance definitions, limiting their use for uncertainty-aware modeling. Third, intensity saturation effects are observed. Certain heavy rainfall episodes (e.g., daily accumulation > 100 mm) are artificially decomposed into uniform 1.0 or 0.1 mm 15-minute bins, underrepresenting peak variability and delaying-response dynamics in surface processes.

Due to these constraints, we excluded these datasets from the main text. Instead, we used curated minute-resolution station data over China. Only stations with complete records, no missing values, and confirmed precipitation processes were retained. Quality control involved removing faulty entries and selecting events with both physical consistency and temporal detail. For spatial alignment, each station's latitude–longitude coordinates were mapped to the corresponding ERA5-Land grid using nearest-neighbour interpolation, ensuring consistency in evaluation across observation and reanalysis datasets.





Supplementary Figure S1. Power spectral density (PSD) analysis across Reynolds numbers (Re = 80–118) for the 2D cylinder wake dataset. Each panel shows the spatially averaged PSD (black), with 95% confidence intervals (shaded), and two power-law fits: the pointwise best fit (red, slope = β) and the mean-spectrum fit (blue, slope = β̄). Background color bands denote characteristic frequency regimes: Kármán vortex street (blue), shear-layer eddies (purple), and small-scale turbulence (orange).





Supplementary Figure S2. Vorticity histograms for reconstructed (orange) and ground-truth (blue) flows across different Reynolds numbers (Re = 80–118). Vertical dashed and dotted lines mark the respective statistics.


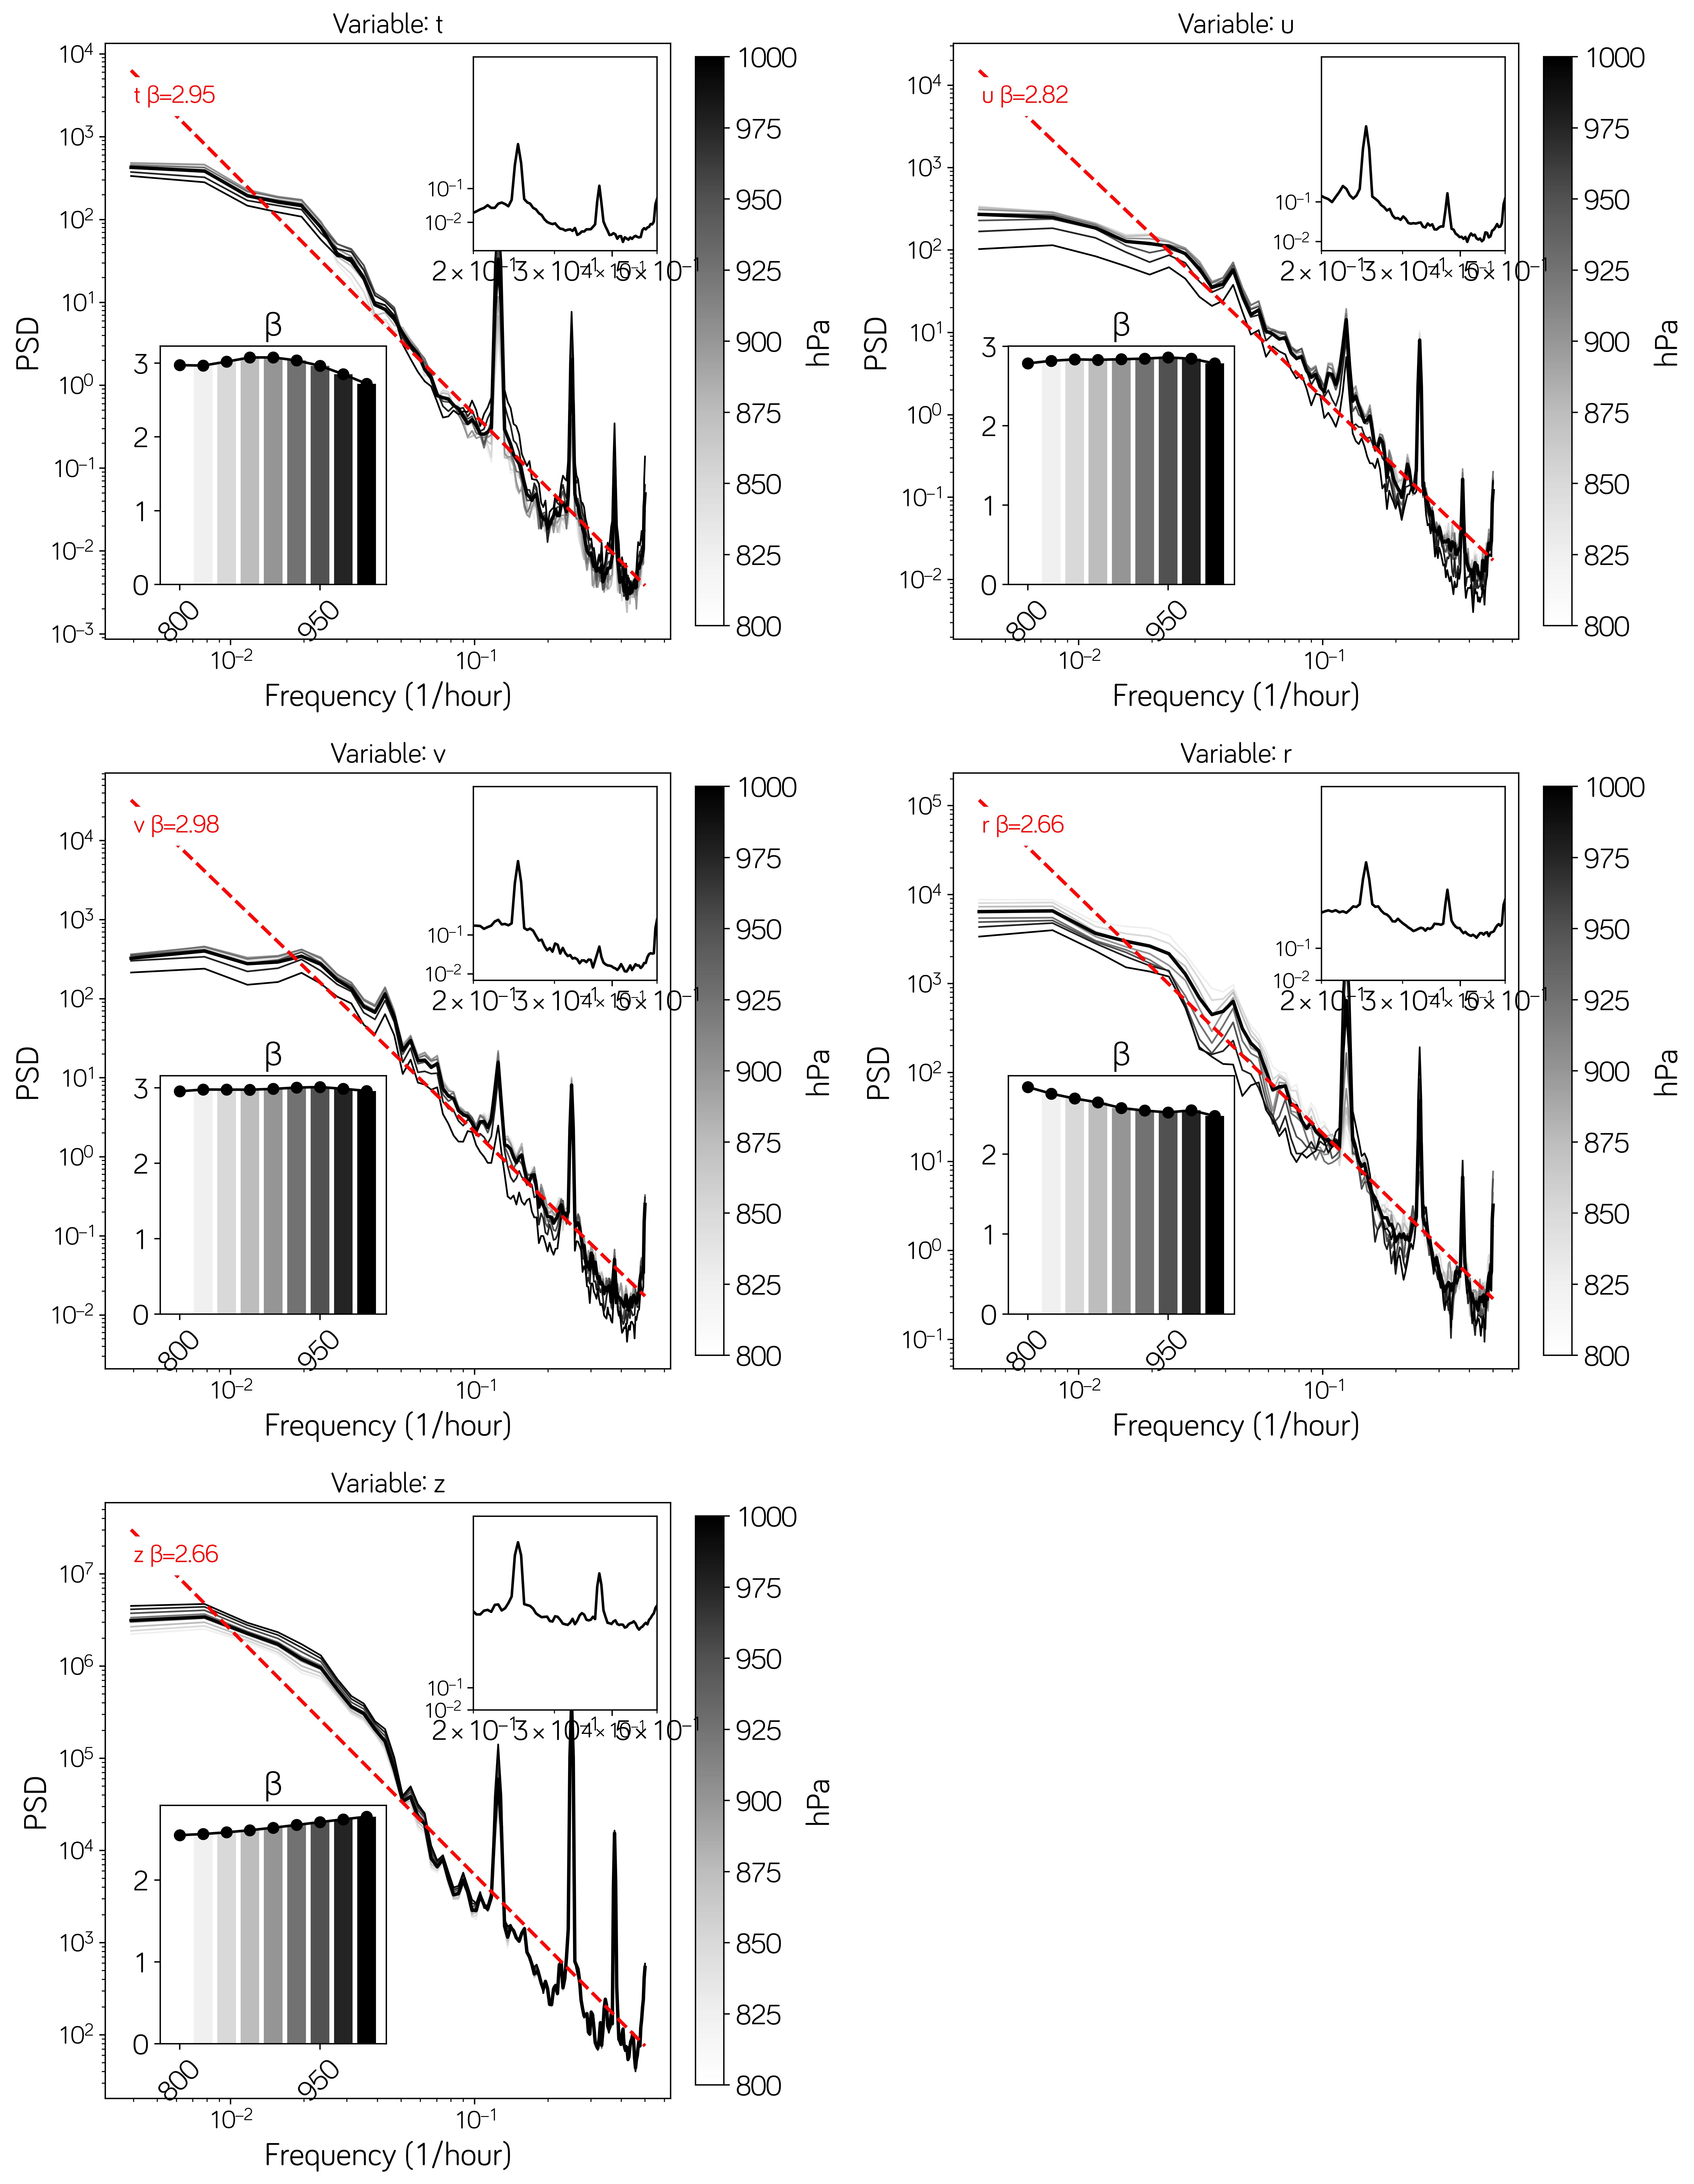


Supplementary Figure S3. Power spectral densities (PSDs) of five key near-surface variables (t, u, v, r, z) from NOAA-20CRv3 3-hourly data, stratified by pressure levels (800–1000 hPa). The mean PSD across levels is shown in black, with power-law fits () in red. Insets indicate the β exponent across levels and local high-frequency peaks.


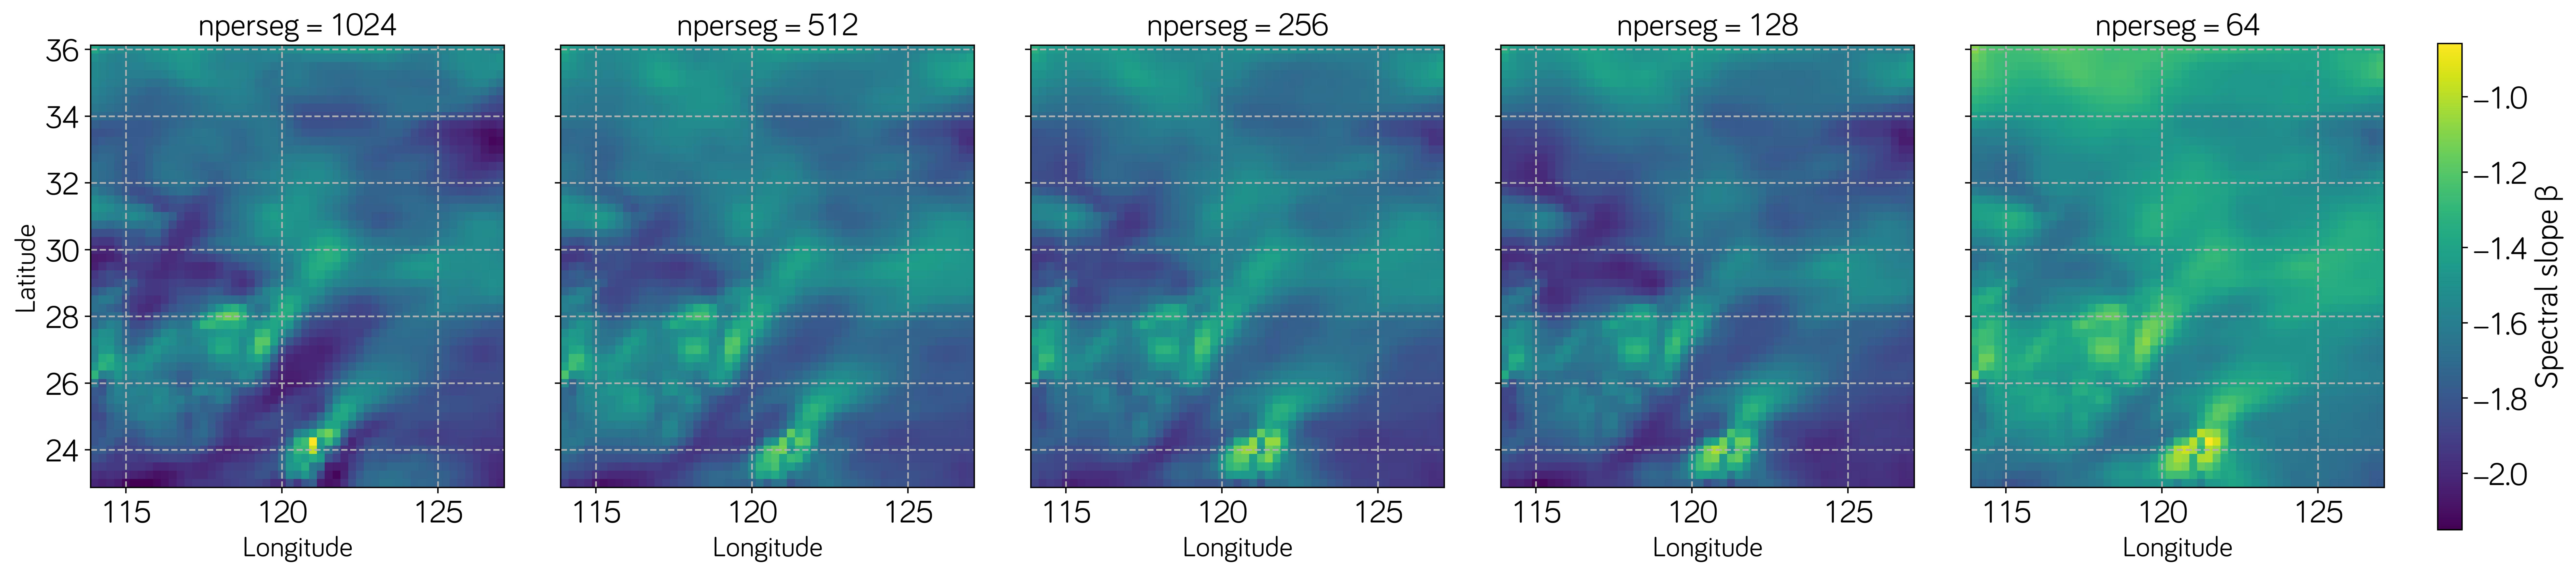


Supplementary Figure S4. Spatial distribution of spectral slope β for the 900 hPa zonal wind component over East Asia, computed using Welch’s method with varying segment lengths (nperseg). Shorter nperseg increases spatial detail but introduces higher variance in β estimation.


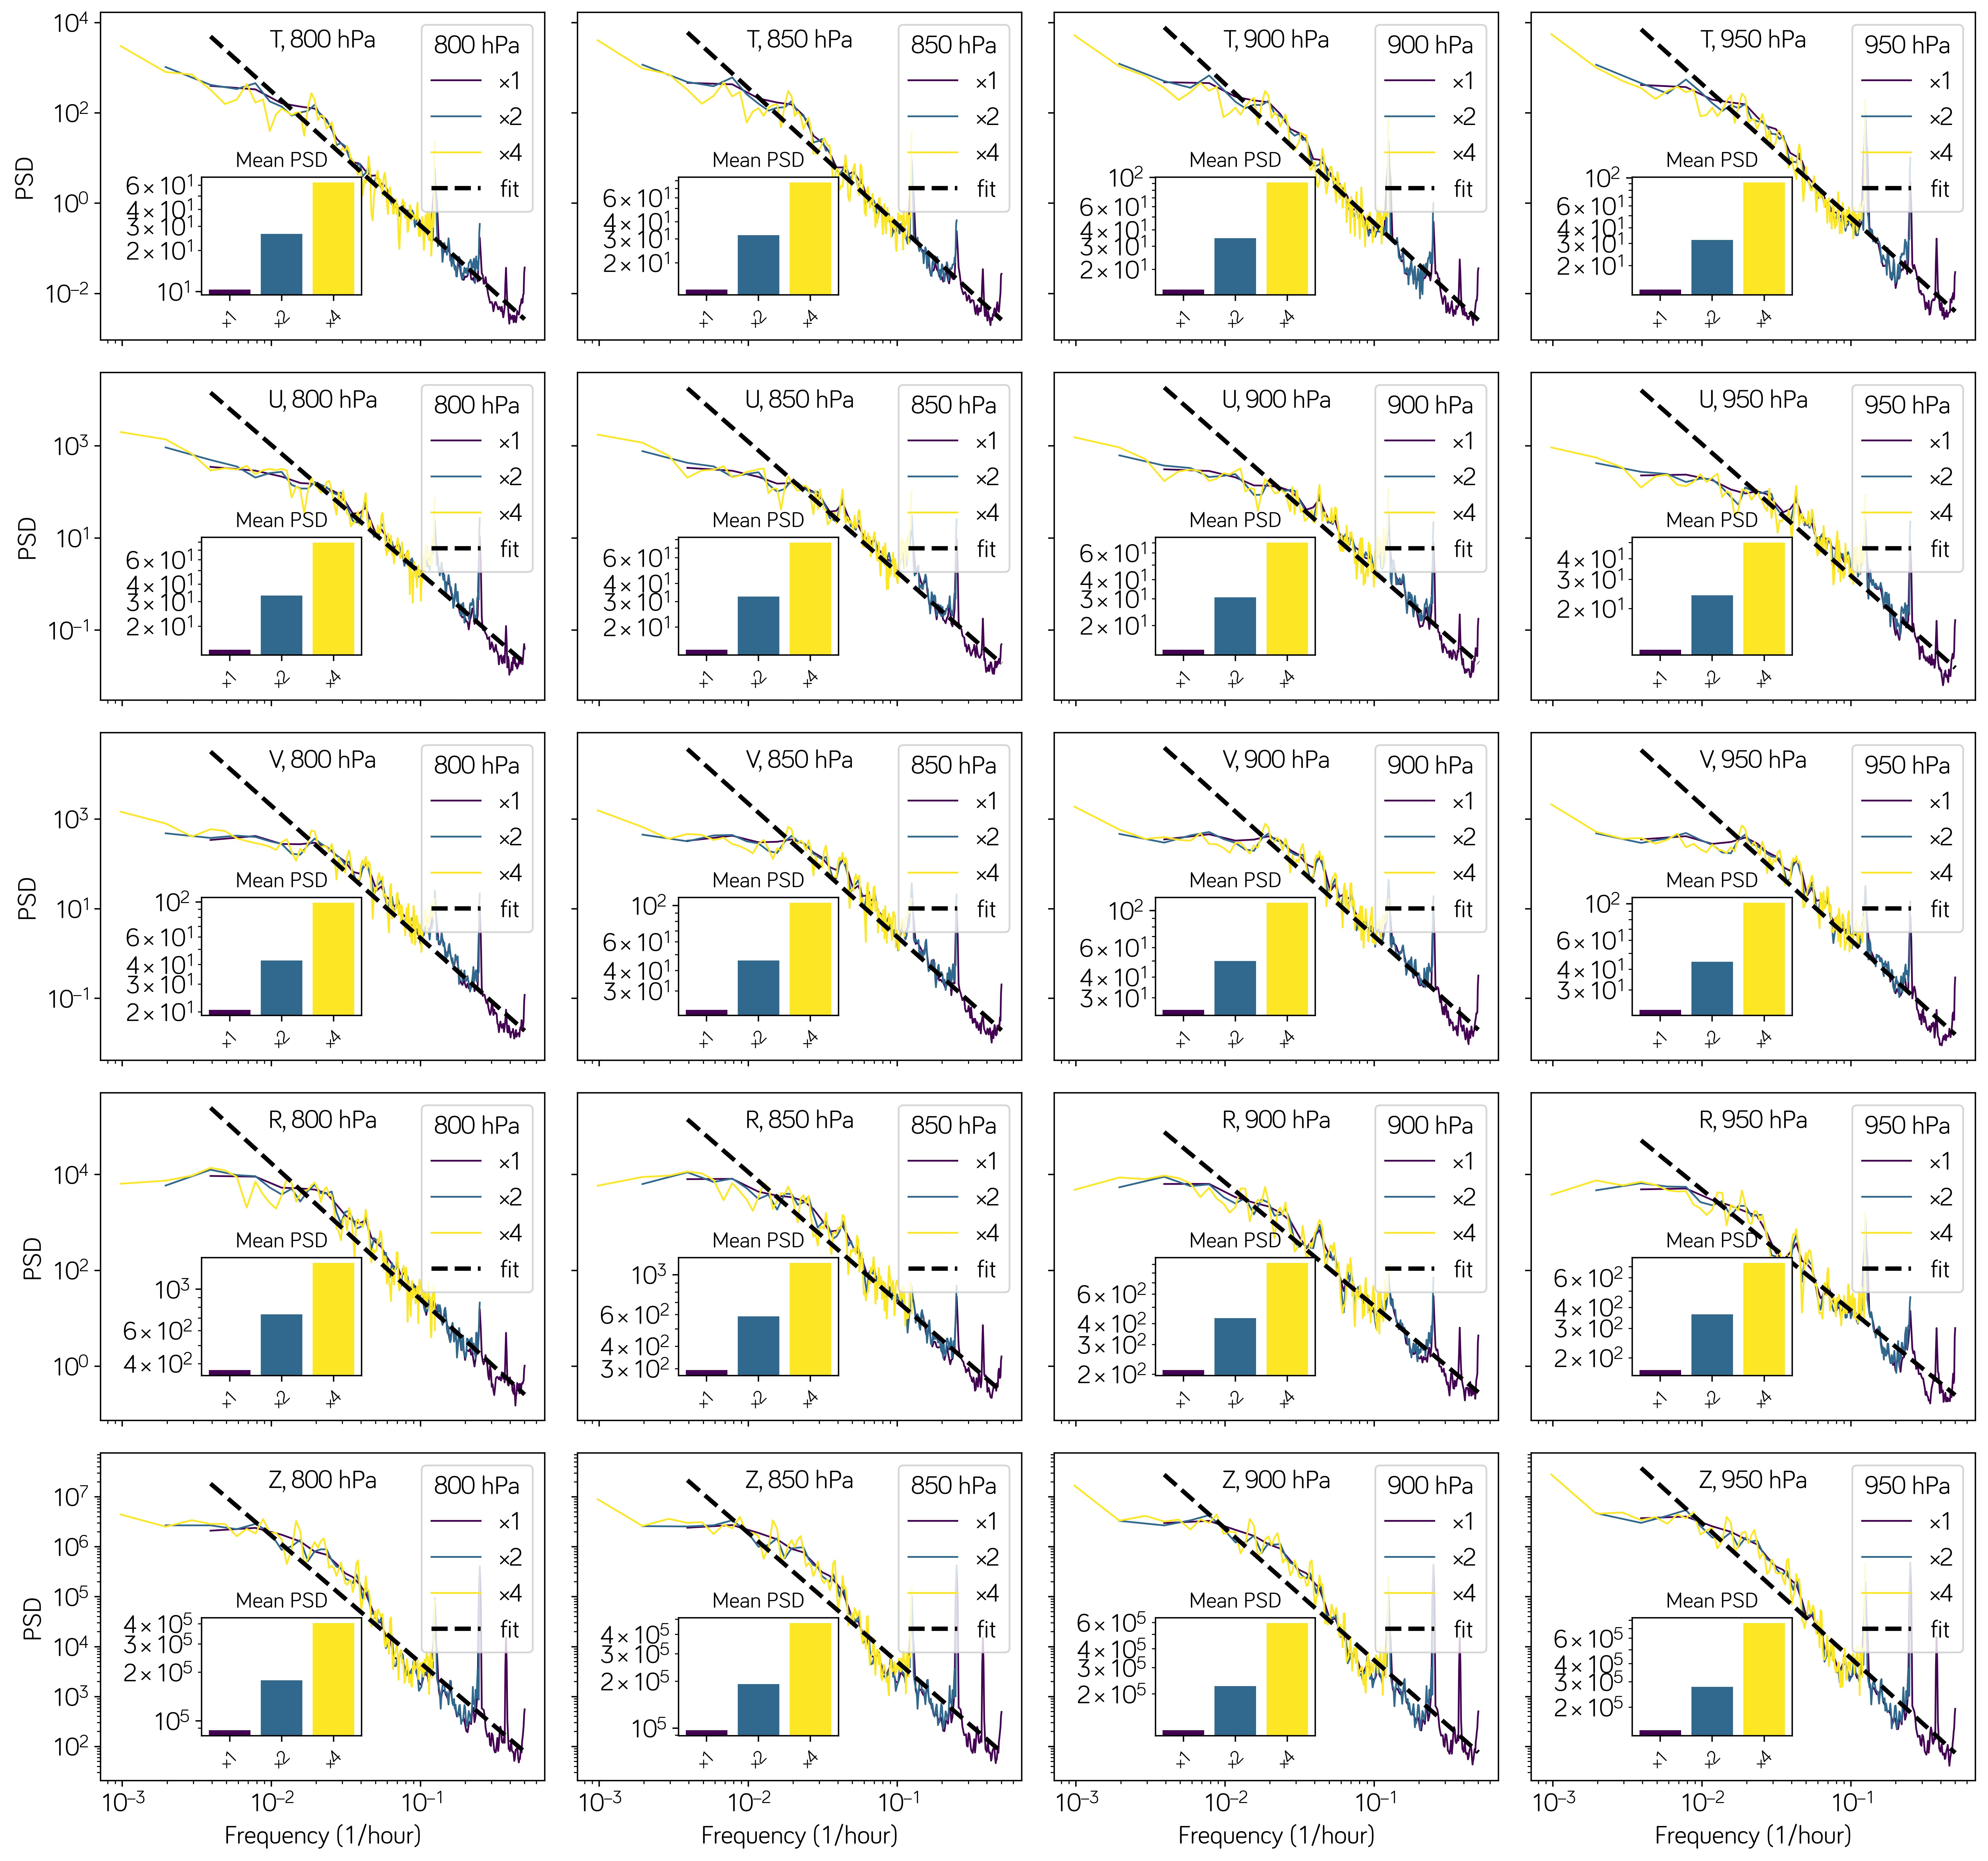


Supplementary Figure S5. Power spectral densities (PSDs) of five atmospheric variables (T, U, V, R, Z) across four pressure levels (800–950 hPa), under three different temporal resolutions (original, ×2, ×4 subsampling). Dashed lines indicate fitted spectral slopes. Insets show the mean PSD values for each decimation level on a logarithmic scale.





Supplementary Figure S6. Errors for a canonical cylinder wake simulation, comparing a deterministic baseline ("Baseline–T") and the token-guided model ("TG–T") against ground truth.


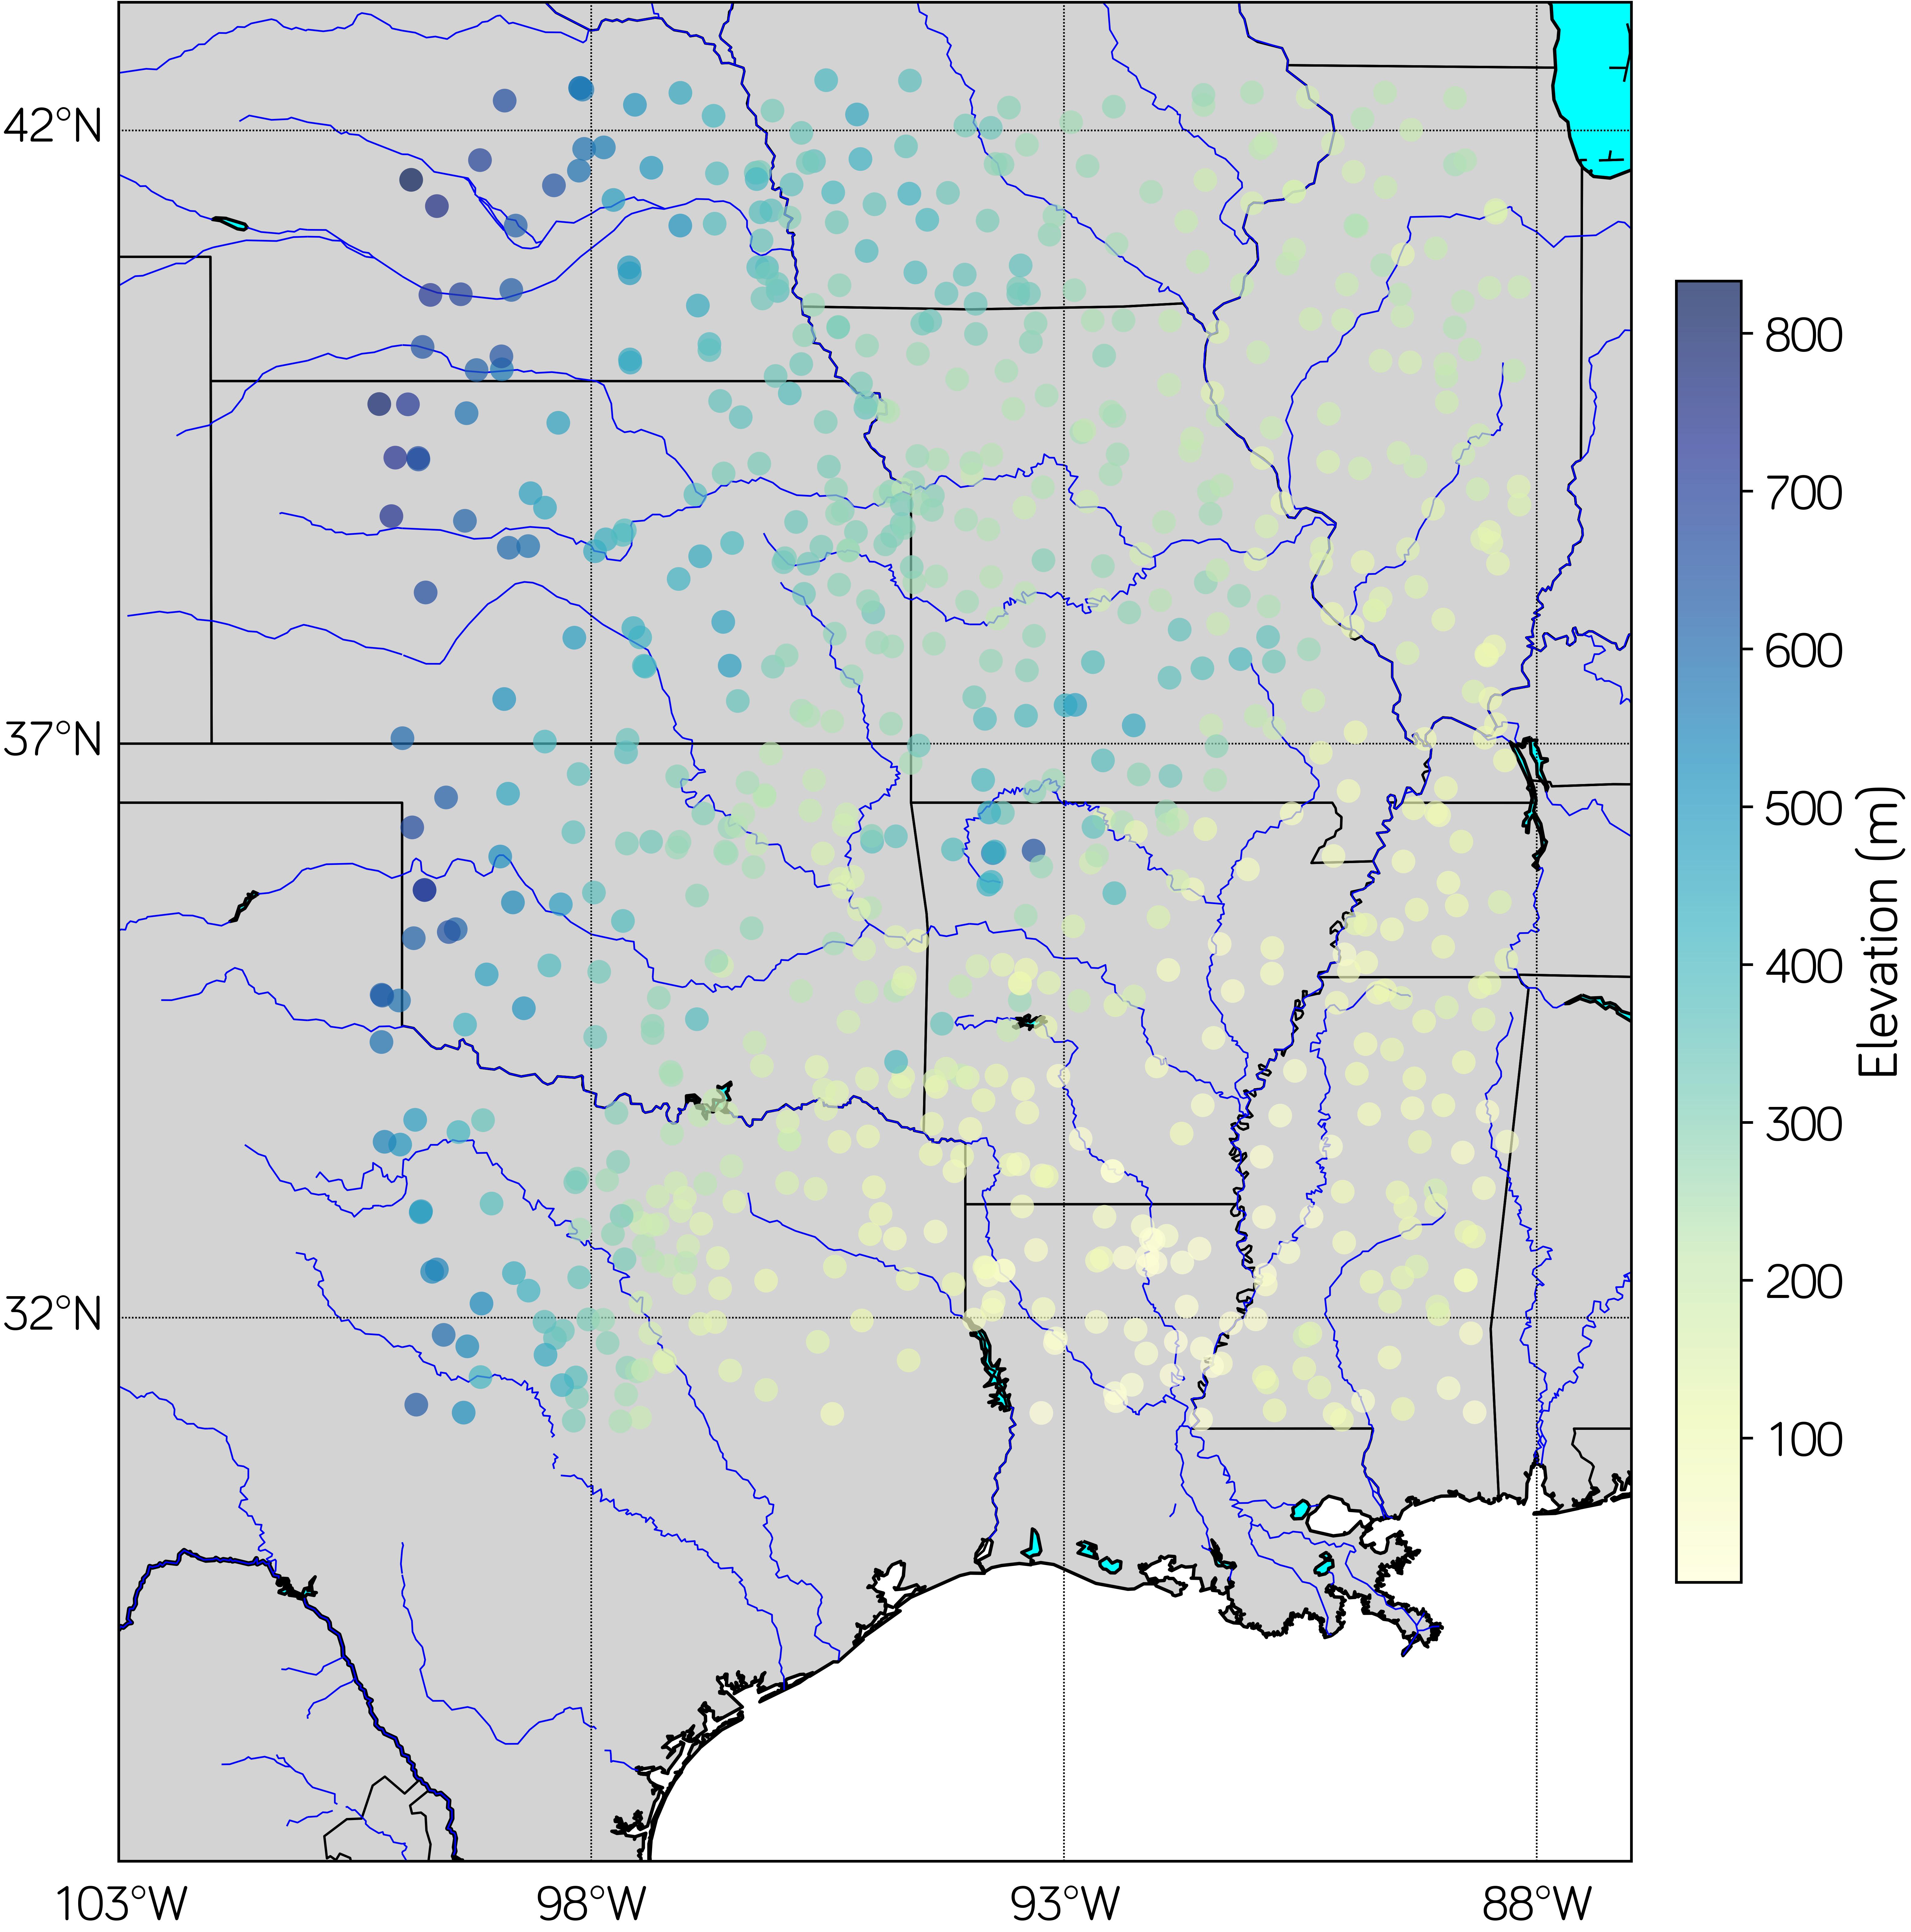


Supplementary Figure S7. Spatial distribution of 15-minute precipitation stations across the central United States, colored by site elevation (in meters). Major river networks are overlaid for reference.





Supplementary Figure S8. Errors for hourly U.S. precipitation from ERA5, comparing a deterministic baseline ("Baseline–T") and the token-guided model ("TG–T") against ground truth.





Supplementary Figure S9. Errors for hourly China precipitation from ERA5, comparing a deterministic baseline ("Baseline–T") and the token-guided model ("TG–T") against ground truth.





Supplementary Figure S10. Errors for 3-hourly near-surface relative humidity from NOAA-20CRv3 (32°S–32°N, 12°W–52°E), comparing a deterministic baseline ("Baseline–T") and the token-guided model ("TG–T") against ground truth.





Supplementary Figure S11. Errors for 3-hourly near-surface relative humidity from NOAA-20CRv3 (4°–68°N, 50°–114°E), comparing a deterministic baseline ("Baseline–T") and the token-guided model ("TG–T") against ground truth.





Supplementary Figure S12. Errors for 3-hourly near-surface temperature from NOAA-20CRv3 (4°S–60°N, 88°–152°E), comparing a deterministic baseline ("Baseline–T") and the token-guided model ("TG–T") against ground truth.


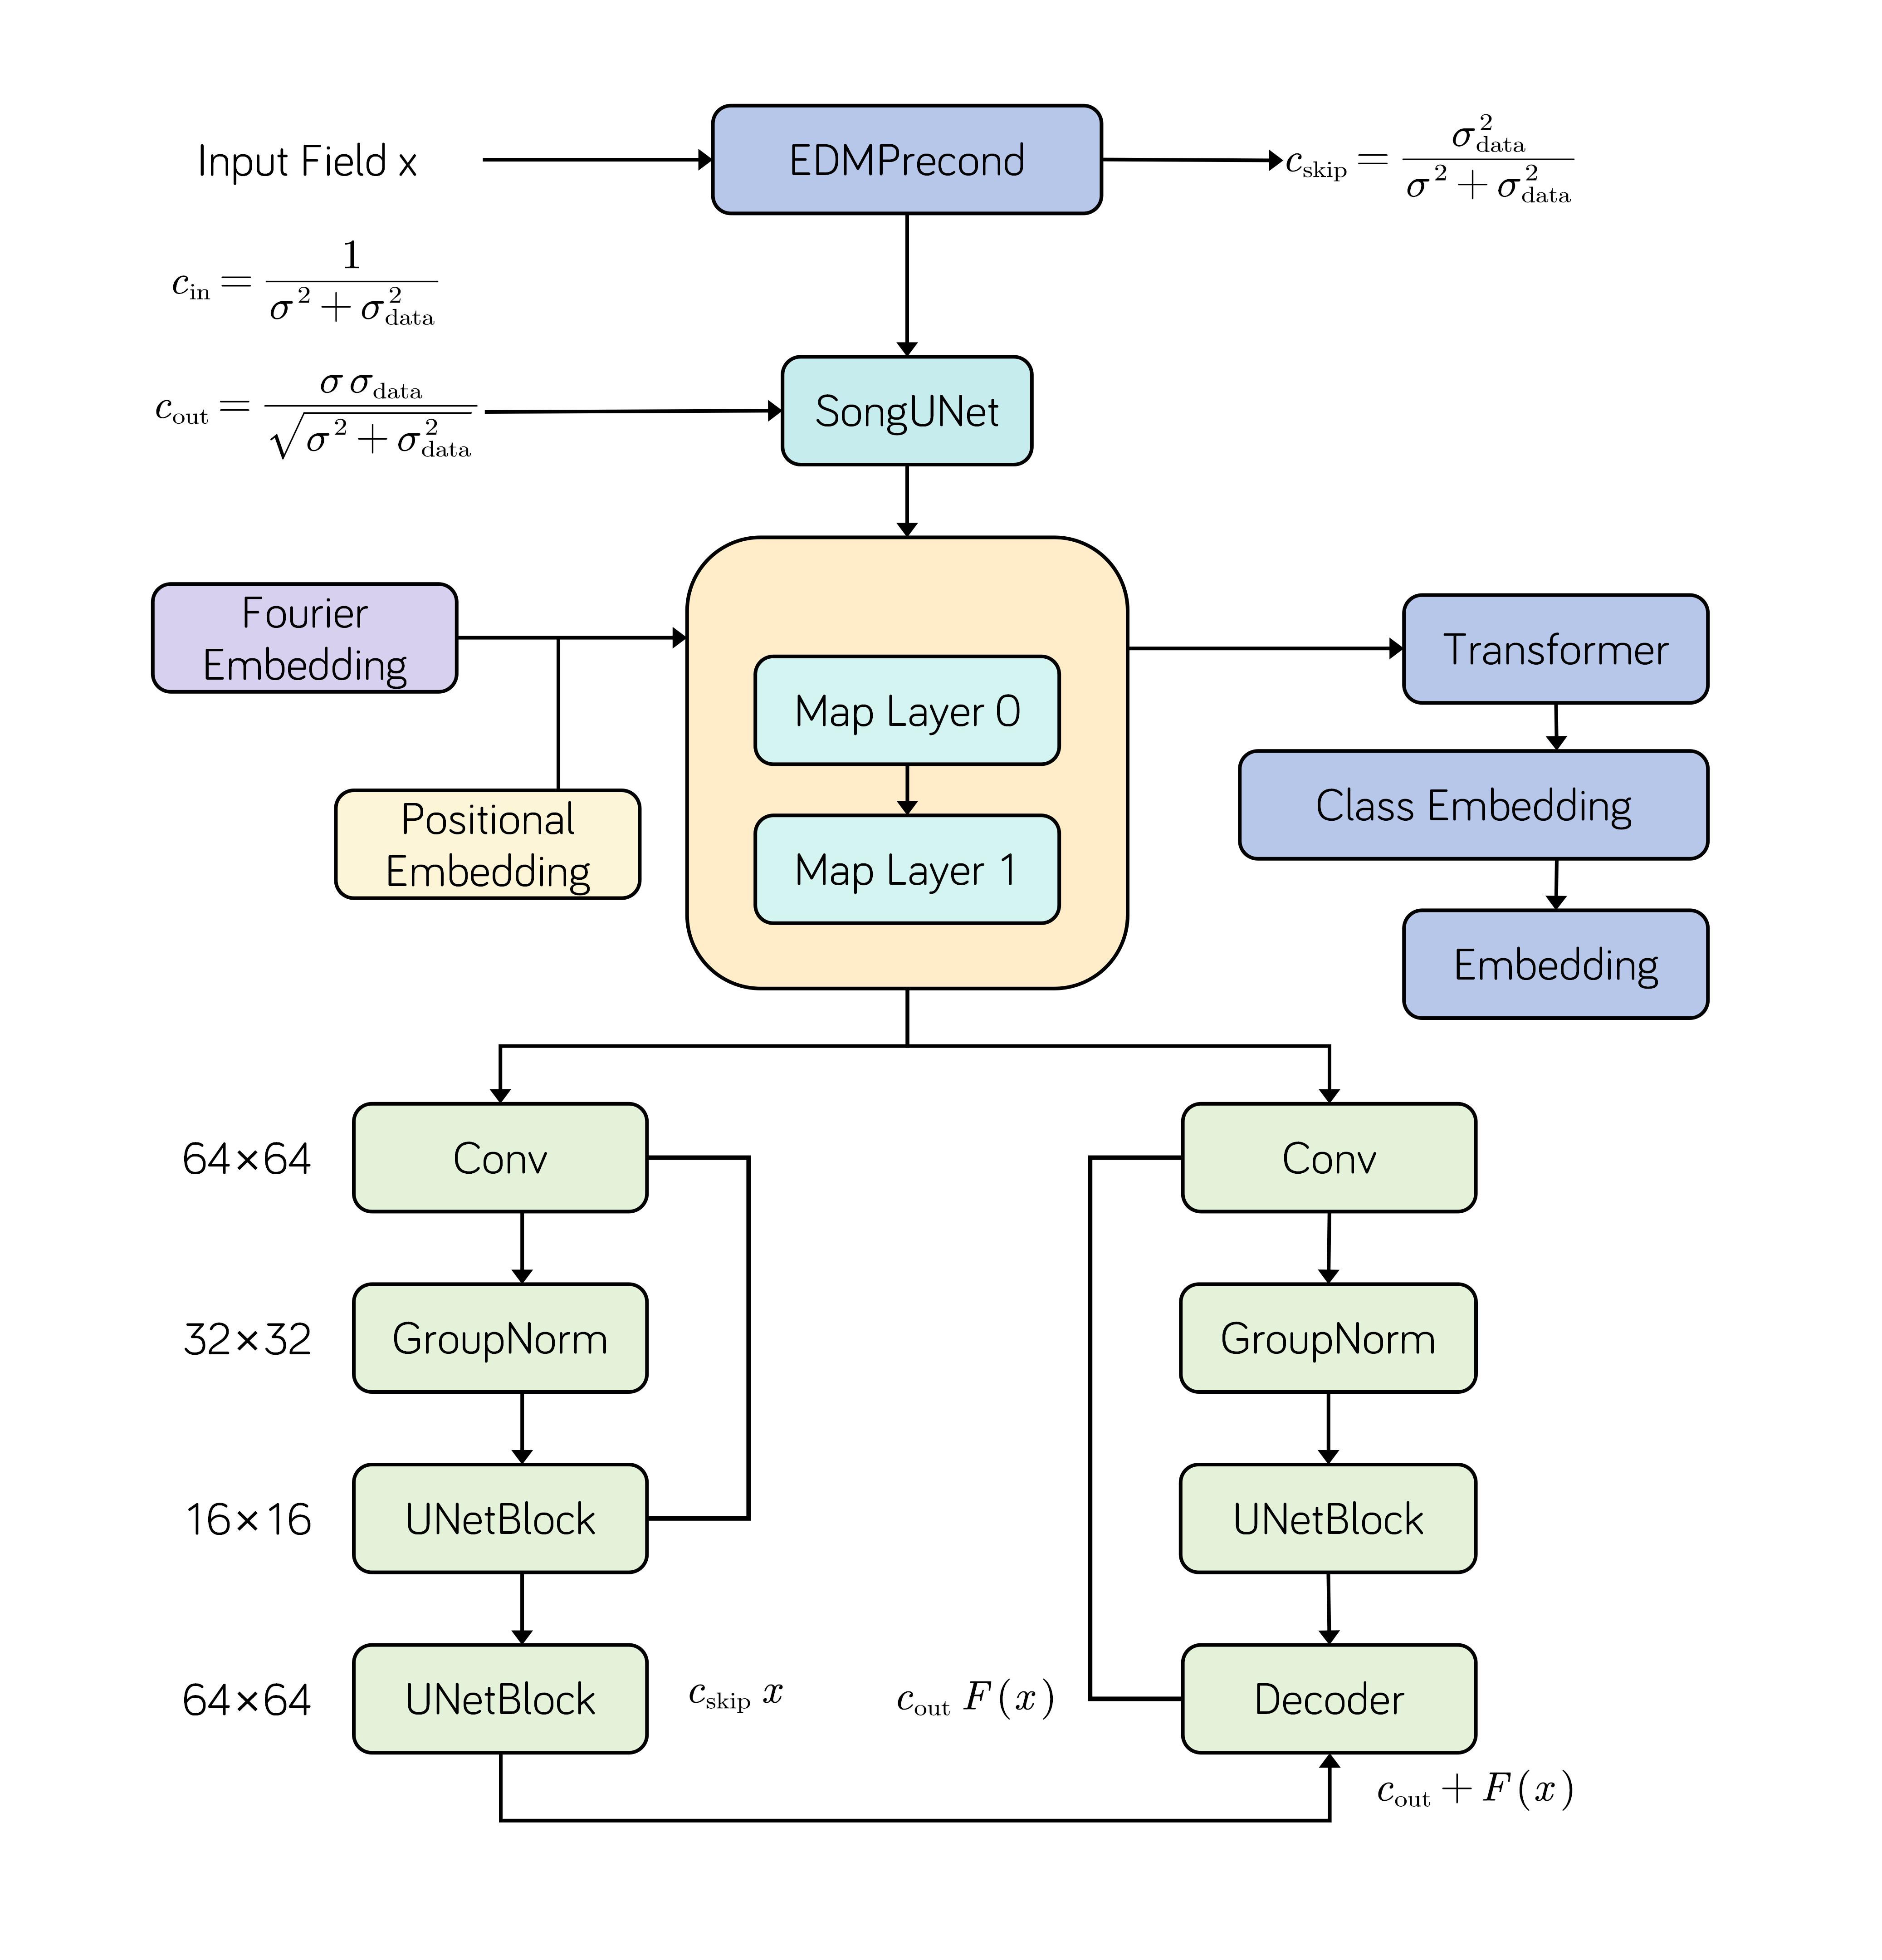


Supplementary Figure S13. Network architecture of the conditional denoising model. The input field is processed through EDM preconditioning and fed into a U-Net backbone (SongUNet) augmented with Fourier and temporal token embeddings. Conditioning tokens are projected via two mapping layers and injected into all attention blocks. The network operates across multiple resolutions with skip connections and outputs a scaled residual prediction , added to the skip path .


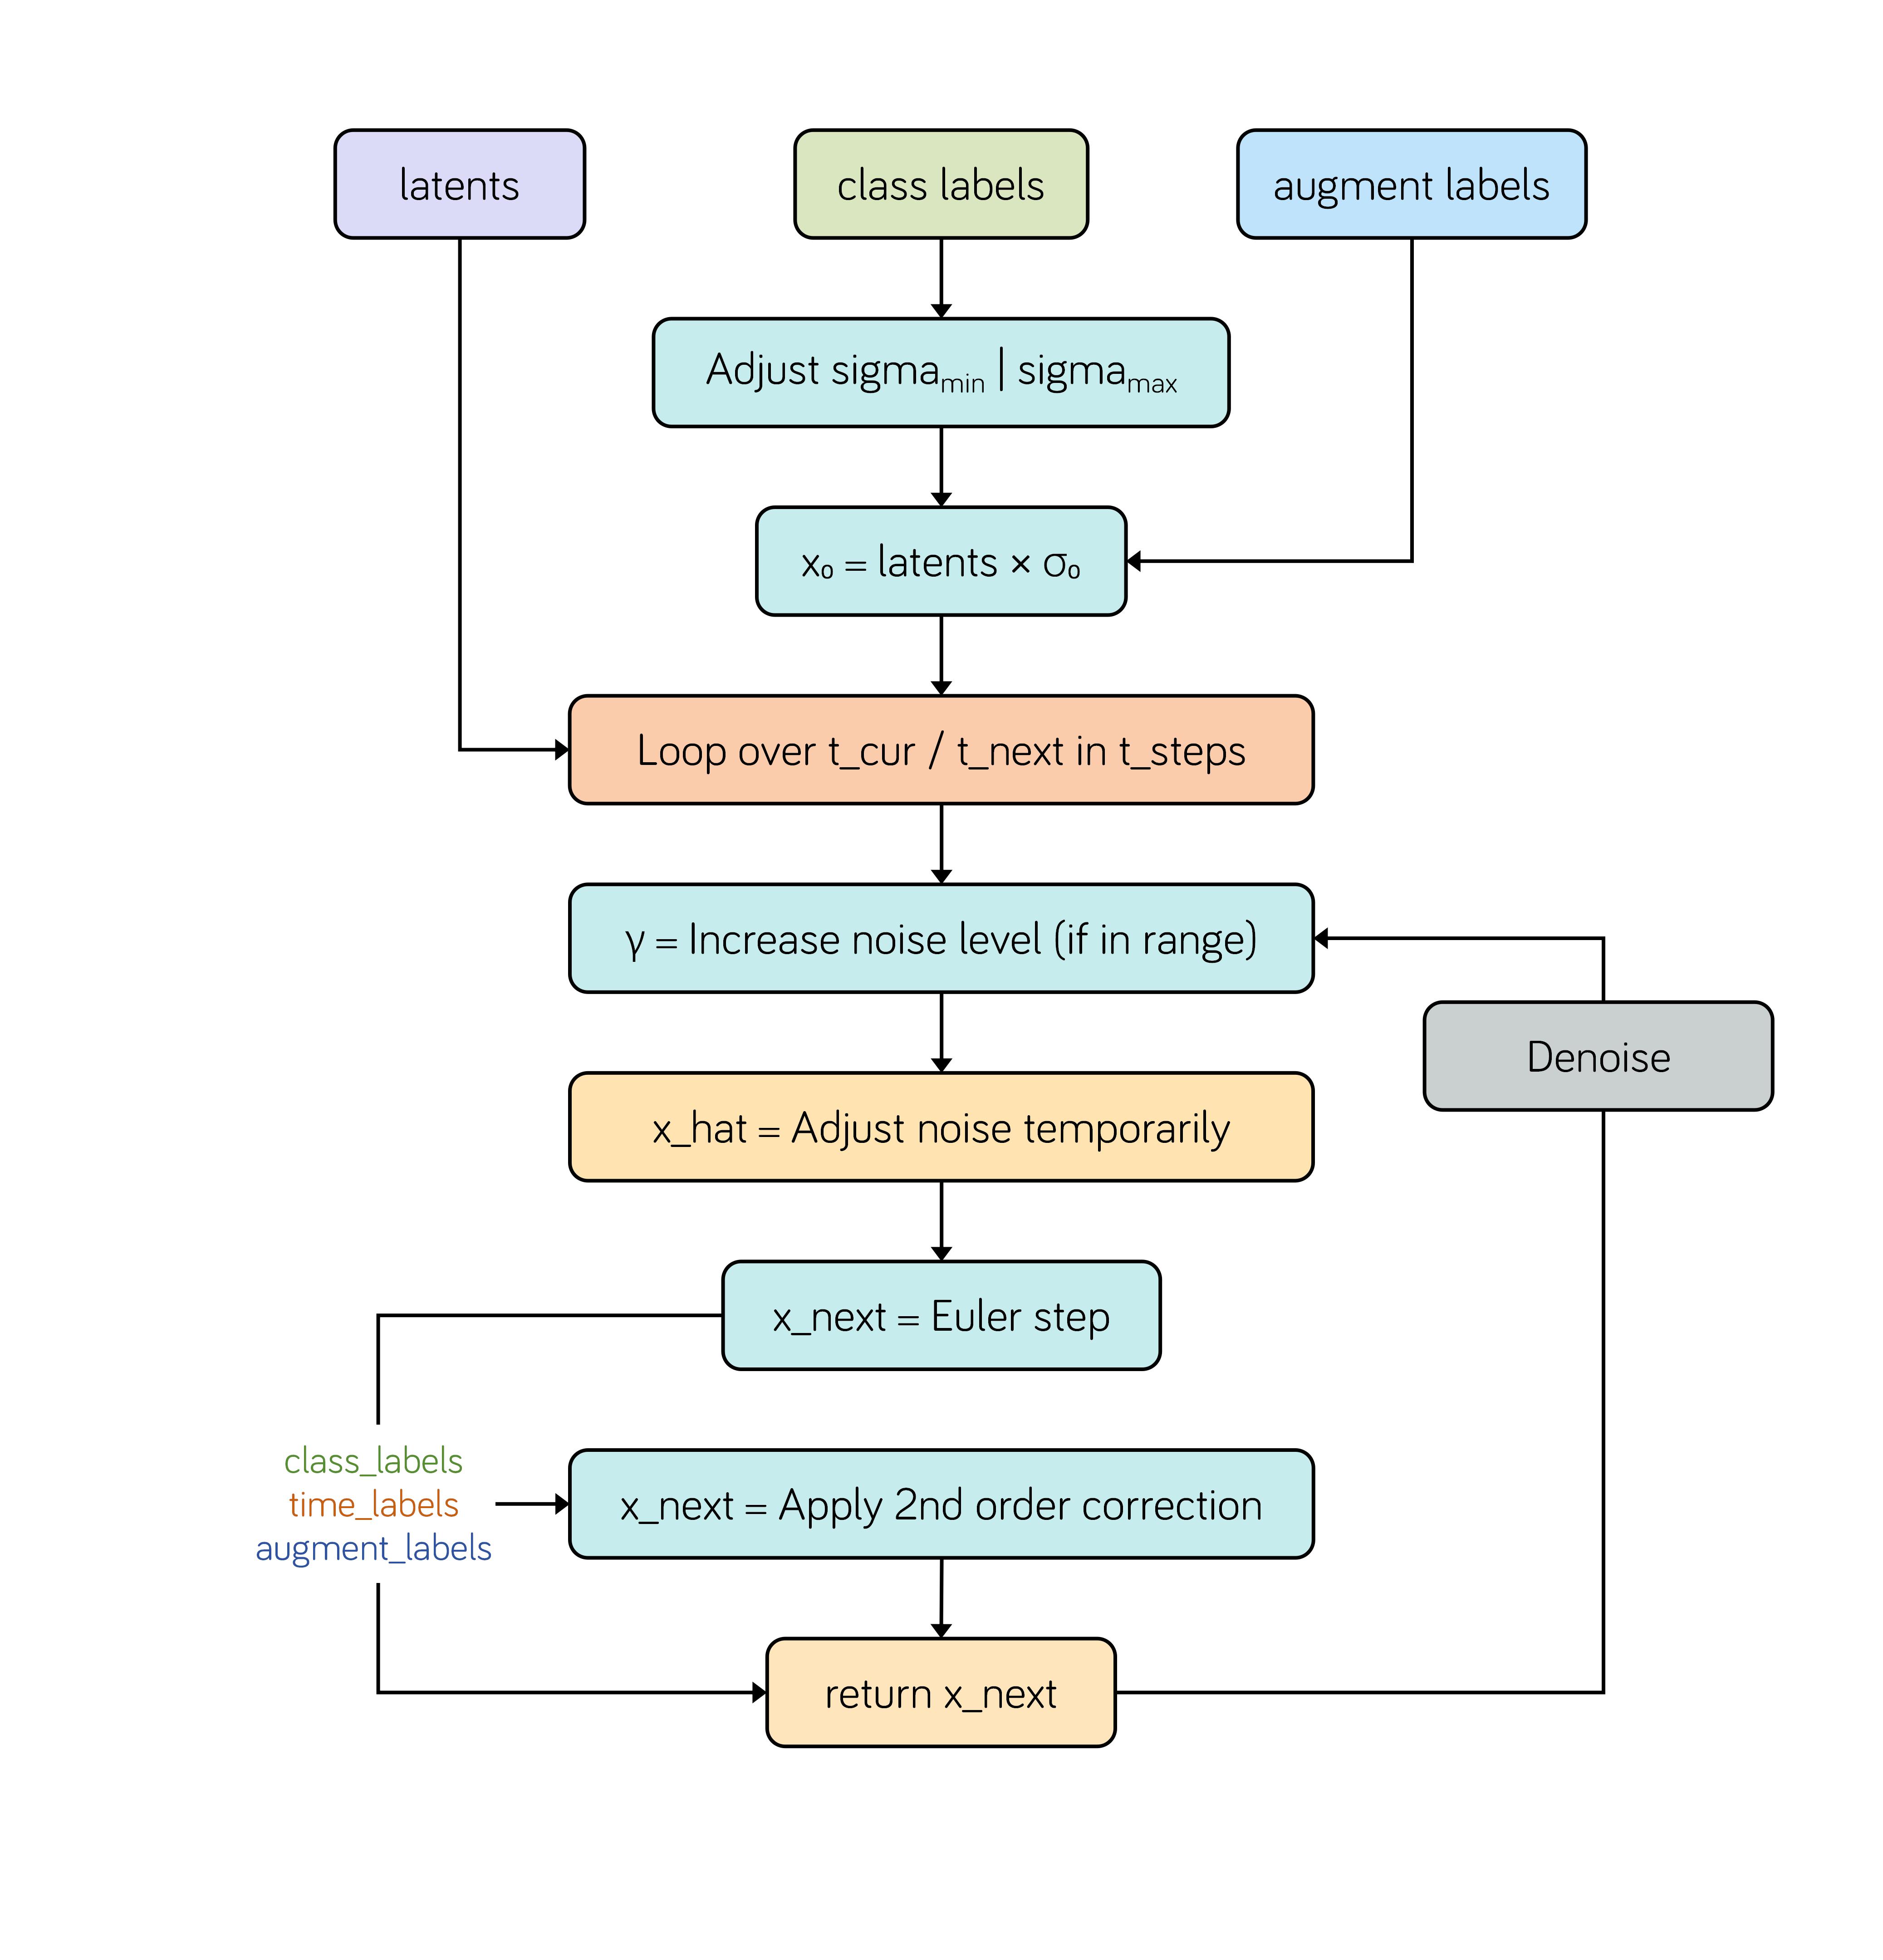


Supplementary Figure S14. Flowchart of the EDM sampling procedure. Given latents and conditioning labels, the sampler iteratively applies noise schedules, denoising, and second-order updates to generate the final field .





Supplementary Figure S15. Performance metrics (MAE, RMSE, SSIM, PSNR, PCC, Spearman, GMSD, FSS, NSE) evaluated over different ensemble sizes (n = 10–150) for 3-hourly near-surface relative humidity from NOAA-20CRv3 (32°S–32°N, 12°W–52°E). Blue dots represent actual values, orange lines show trends, green dashed lines are exponential decay fits, and purple dash-dot lines denote baseline performance (n = 1).





Supplementary Figure S16. Performance metrics (MAE, RMSE, SSIM, PSNR, PCC, Spearman, GMSD, FSS, NSE) evaluated over different ensemble sizes (n = 10–150) for 3-hourly near-surface relative humidity from NOAA-20CRv3 (4°–68°N, 50°–114°E). Blue dots represent actual values, orange lines show trends, green dashed lines are exponential decay fits, and purple dash-dot lines denote baseline performance (n = 1).





Supplementary Figure S17. Performance metrics (MAE, RMSE, SSIM, PSNR, PCC, Spearman, GMSD, FSS, NSE) evaluated over different ensemble sizes (n = 10–150) for 3-hourly near-surface temperature from NOAA-20CRv3 (4°S–60°N, 88°–152°E). Blue dots represent actual values, orange lines show trends, green dashed lines are exponential decay fits, and purple dash-dot lines denote baseline performance (n = 1).





Supplementary Figure S18. Performance metrics (MAE, RMSE, SSIM, PSNR, PCC, Spearman, GMSD, FSS, NSE) evaluated over different ensemble sizes (n = 10–150) for the wake dataset. Blue dots represent actual values, orange lines show trends, green dashed lines are exponential decay fits, and purple dash-dot lines denote baseline performance (n = 1).





Supplementary Figure S19. Performance metrics (MAE, RMSE, SSIM, PSNR, PCC, Spearman, GMSD, FSS, NSE) across different inference steps (10–150) with fixed ensemble size n=20 on the 3-hourly near-surface relative humidity from NOAA-20CRv3 (32°S–32°N, 12°W–52°E). Orange lines show metric trends, green dashed lines indicate exponential fits, and purple dash-dot lines mark the baseline performance at step = 10.





Supplementary Figure S20. Performance metrics (MAE, RMSE, SSIM, PSNR, PCC, Spearman, GMSD, FSS, NSE) across different inference steps (10–150) with fixed ensemble size n=20 on 3-hourly near-surface relative humidity from NOAA-20CRv3 (4°–68°N, 50°–114°E). Orange lines show metric trends, green dashed lines indicate exponential fits, and purple dash-dot lines mark the baseline performance at step = 10.





Supplementary Figure S21. Performance metrics (MAE, RMSE, SSIM, PSNR, PCC, Spearman, GMSD, FSS, NSE) across different inference steps (10–150) with fixed ensemble size n=20 on 3-hourly near-surface temperature from NOAA-20CRv3(4°S–60°N, 88°–152°E). Orange lines show metric trends, green dashed lines indicate exponential fits, and purple dash-dot lines mark the baseline performance at step = 10.





Supplementary Figure S22. Performance metrics (MAE, RMSE, SSIM, PSNR, PCC, Spearman, GMSD, FSS, NSE) across different inference steps (10–150) with fixed ensemble size n=20 on the wake dataset. Orange lines show metric trends, green dashed lines indicate exponential fits, and purple dash-dot lines mark the baseline performance at step = 10.


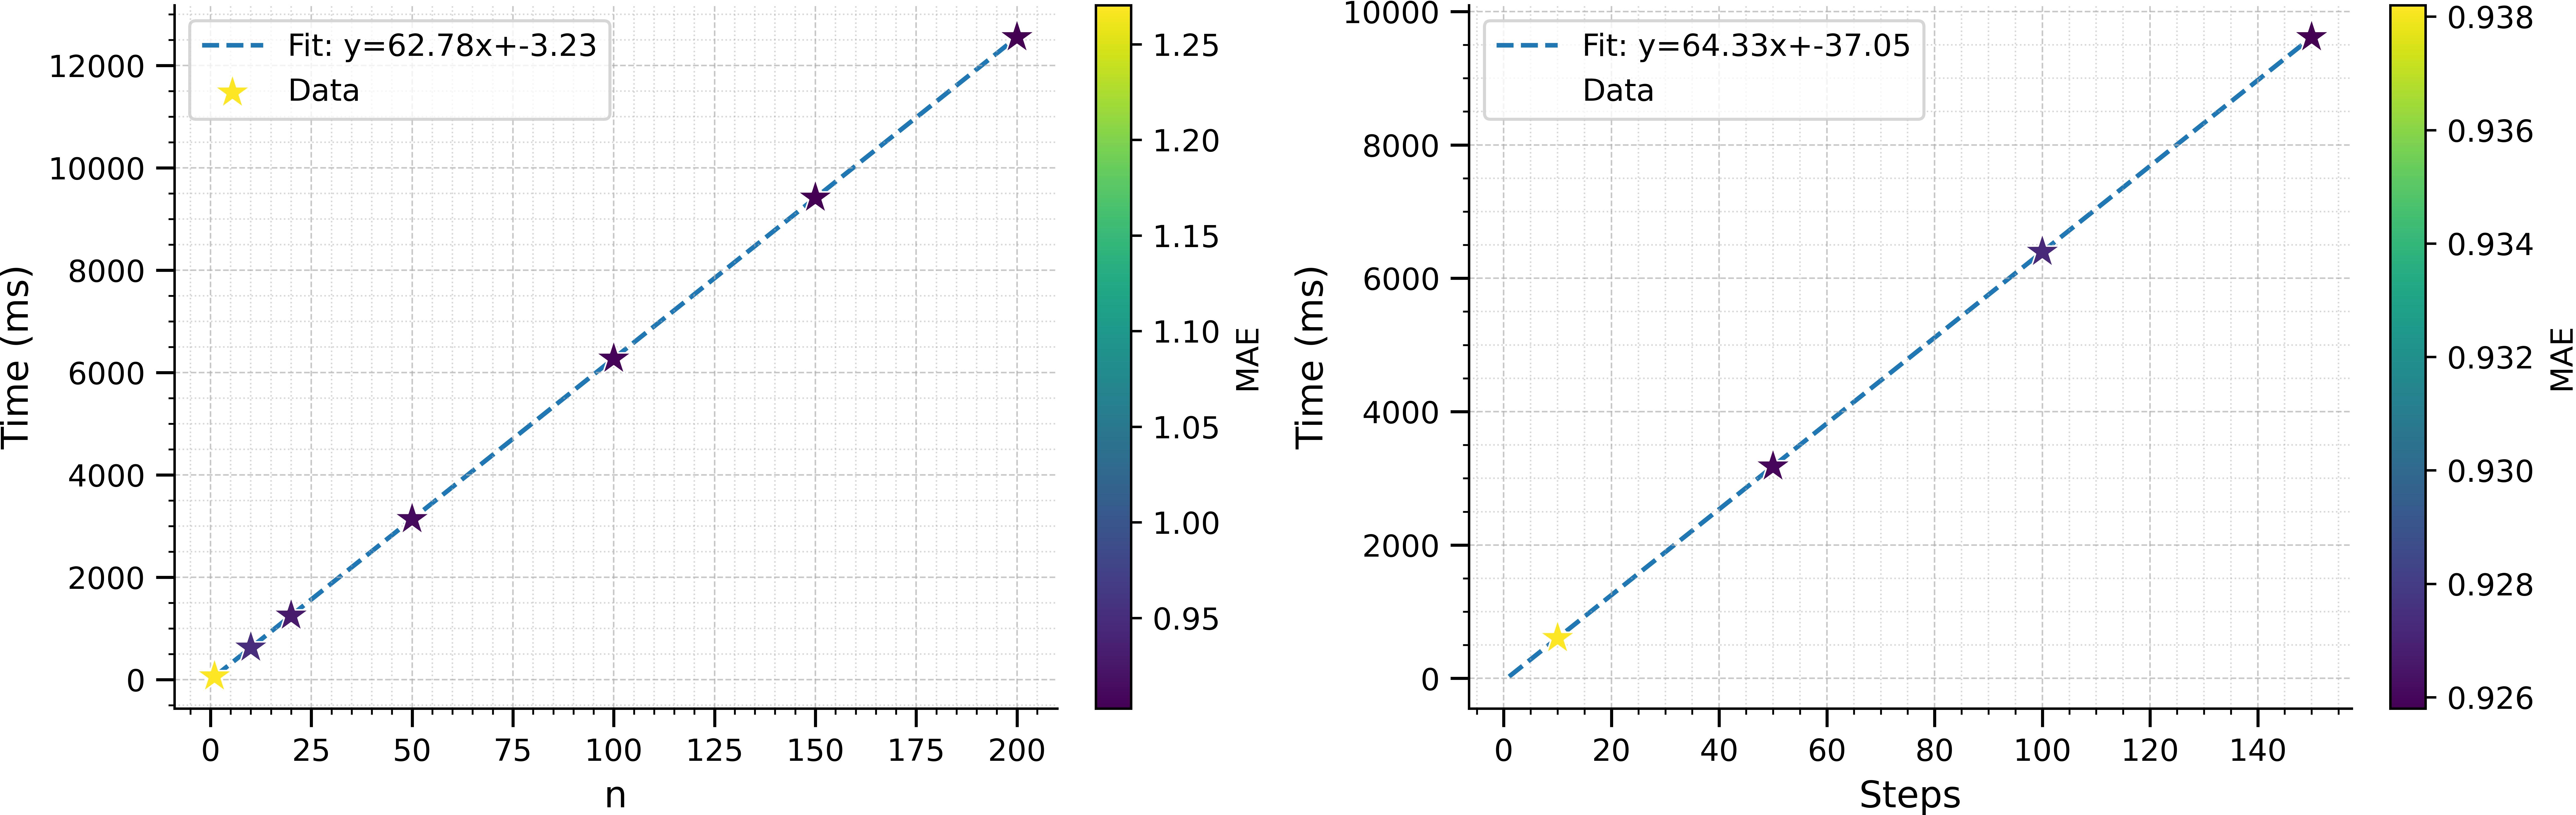


Supplementary Figure S23. Inference time as a function of ensemble size n (left) and diffusion steps (right), measured in milliseconds per sample. Dashed lines show linear fits, and marker color indicates MAE.
